# Supplementary material
Source: publisher figshare collection journal article supplement (https://springernature.figshare.com/ndownloader/files/22315335)
Supplement: Supplementary file [file 22315335]

**Additional File 1: Supplementary 9 figures**

**CPEB2-activated PDGFR $\alpha$  mRNA translation contributes to myofibroblast proliferation and pulmonary alveologenesis**

Yen-Ting Lai<sup>1,4</sup>, Hsu-Wen Chao<sup>2,3,4</sup>, Alan Chuan-Ying Lai<sup>1</sup>, Shu-Hui Lin<sup>2,3</sup>,  
Ya-Jen Chang<sup>1,\*</sup>, and Yi-Shuian Huang<sup>1,\*</sup>

<sup>1</sup>Institute of Biomedical Sciences, Academia Sinica, Taipei 11529, Taiwan

<sup>2</sup>Department of Physiology, School of Medicine, College of Medicine,  
Taipei Medical University, Taipei 11031, Taiwan.

<sup>3</sup>Graduate Institute of Medical Sciences, College of Medicine, Taipei  
Medical University, Taipei 11031, Taiwan

<sup>4</sup>These authors contributed equally

Only the elastic fibers in alveolar sacs (red arrows) were analyzed

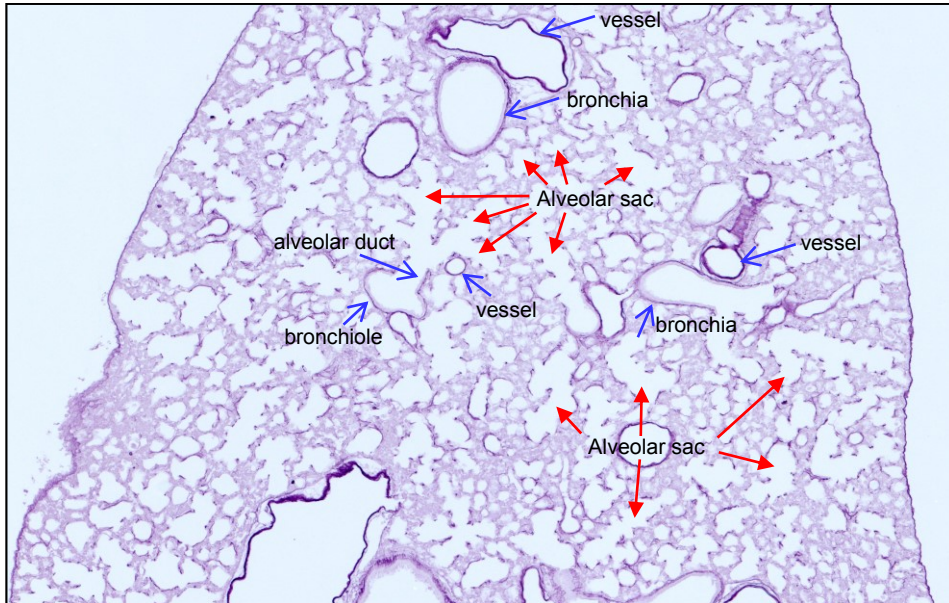

**Figure S1.** An example image for analyzing elastic fibers. Only alveolar elastic fibers, at the tips of secondary septa or alveolar walls, were selected for quantification in Fig. 4c-e.

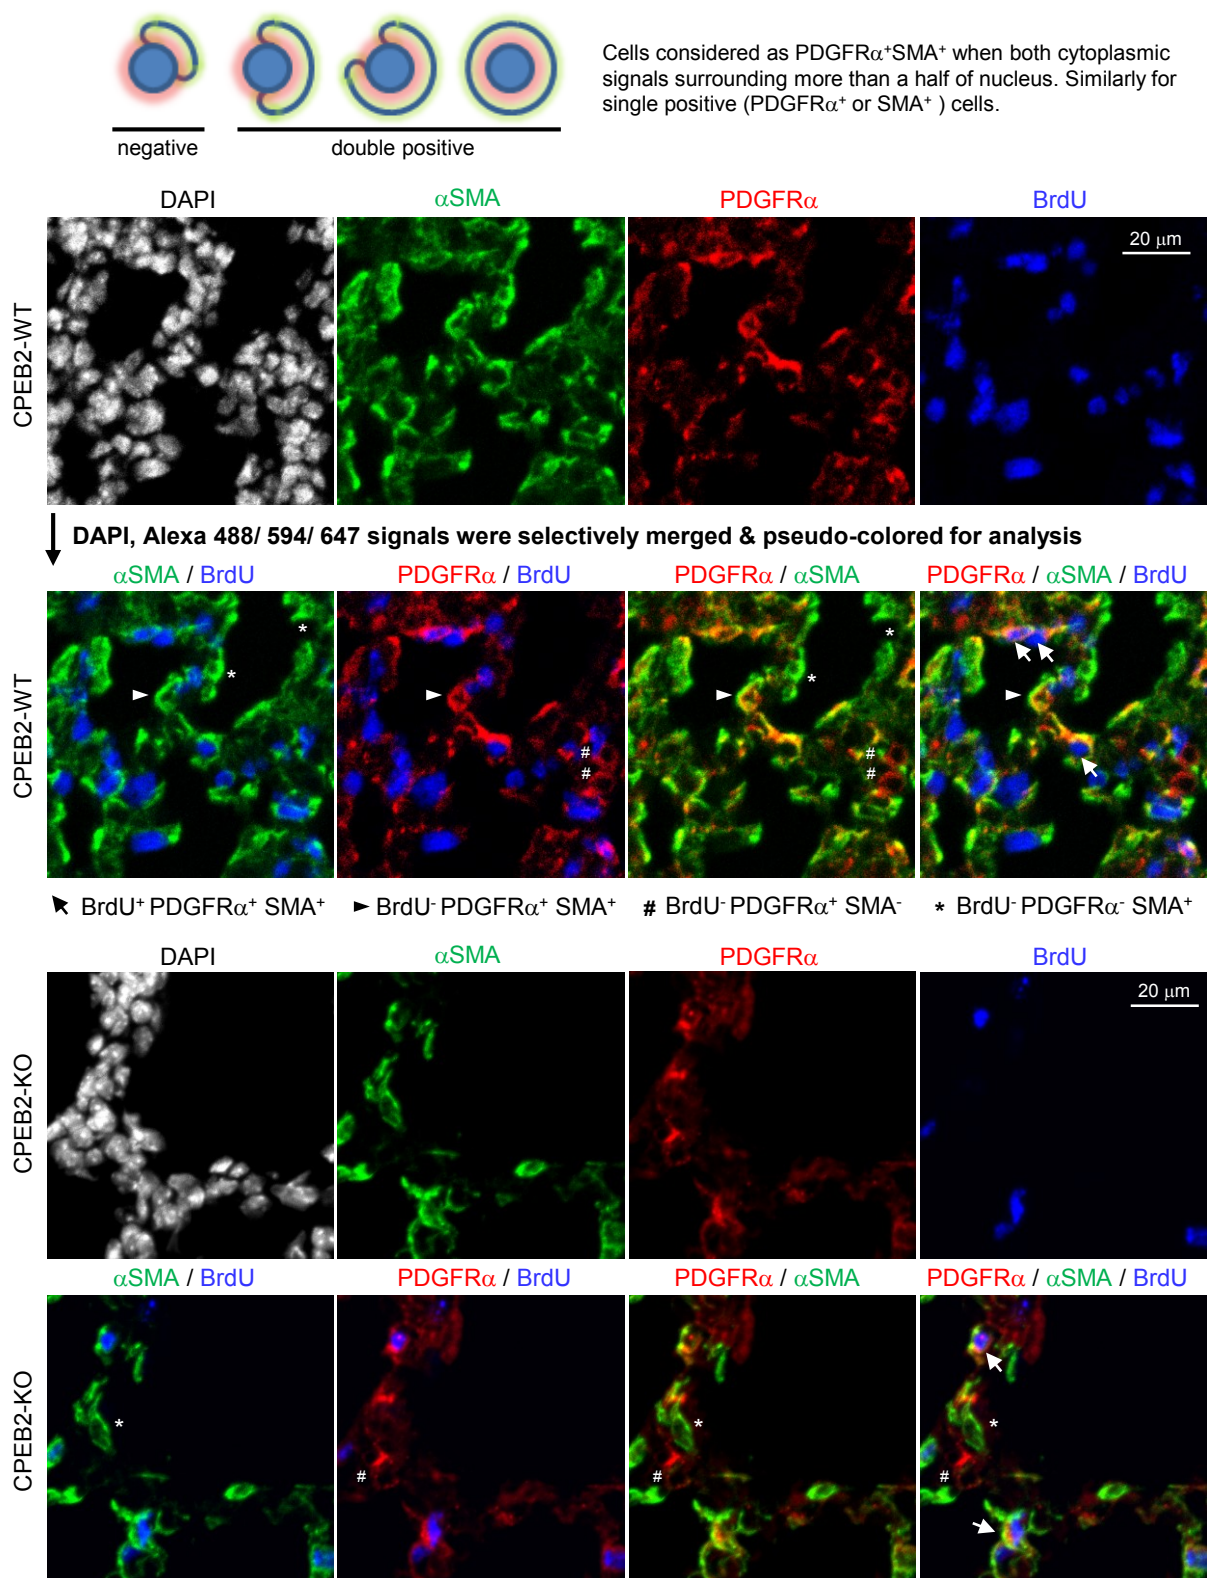

**Figure S2.** Example images for counting Immunofluorescence signal-positive cells. The 4-channel images taken from CPEB2-WT and CPEB2-KO pulmonary sections labelled for DAPI,  $\alpha$ SMA, PDGFR $\alpha$  and BrdU could be selectively merged and pseudo-colored for image presentation and quantification.



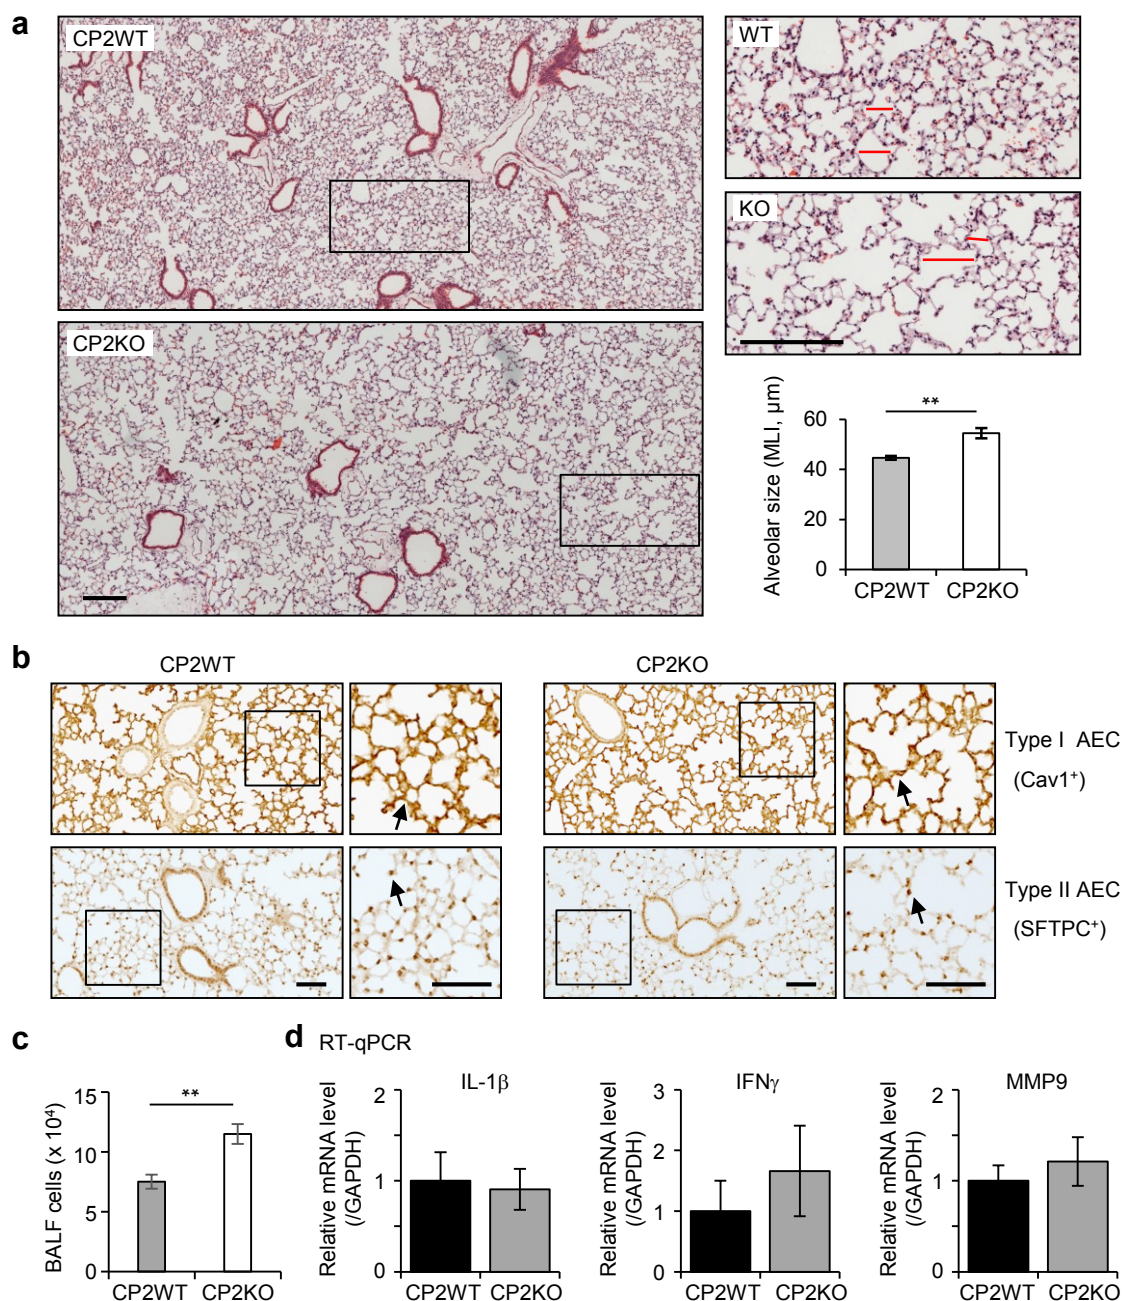

**Figure S3.** Enlarged alveolar space in adult CPEB2-KO mice. **a** H&E staining of lung sections prepared from adult CPEB2-WT (CP2WT) and CPEB2-KO (CP2KO) mice (P60,  $n = 8$  mice per group). Histological analysis to determine the mean linear intercepts (MLI, examples denoted by red lines). Scales,  $200 \mu\text{m}$ . **b** Immunohistochemical staining of caveolin-1 (Cav1) for type I alveolar epithelial cells (AECs) and pro-surfactant-C (SFTPC) for type II AECs in adult lung sections. Arrows denote the positive signals. Scales,  $100 \mu\text{m}$ . **c** The number of leukocytes in the bronchoalveolar lavage fluid (BALF) from CP2WT ( $n = 5$ ) and CP2KO mice ( $n = 6$ ). **d** Lungs were isolated from adult CP2WT and CP2KO mice ( $n = 4$ -5 per group) for RT-qPCR of IL-1 $\beta$ , IFN $\gamma$  and MMP9 mRNA levels relative to GAPDH. Data are mean  $\pm$  s.e.m,  $^{**}P < 0.01$ , by two-tailed Student's  $t$  test.

**a** Alveologenesis: formation of 2<sup>nd</sup> septa

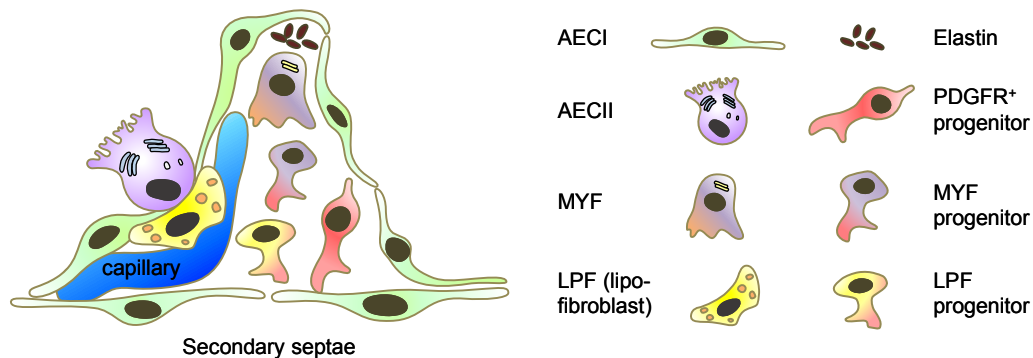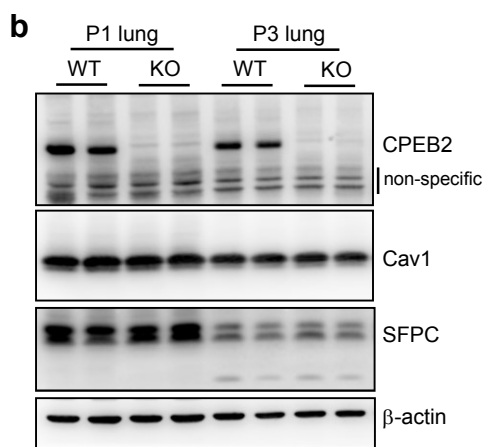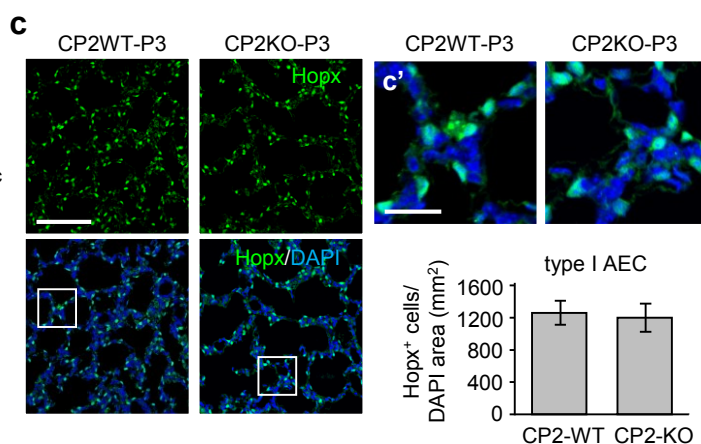

**Figure S4.** CPEB2 deficiency does not affect the populations of type I and type II AECs. **a** Illustration of alveolar cells involved in the formation of secondary septa during the alveolar phase of lung development. **b** Immunoblotting of caveolin-1 (Cav1) for type I AECs and pro-surfactant-C (SFPC) for type II AECs in P1 and P3 lung lysates. **c** Hoxp-immunostained images from P3 WT and CPEB2-KO lungs with magnified images of selected areas shown in **c'**. The number of Hoxp<sup>+</sup> type I AECs was quantified from 5 mice per genotype. Data are mean  $\pm$  s.e.m. Scales, 100  $\mu$ m in **c** and 25  $\mu$ m in **c'**.

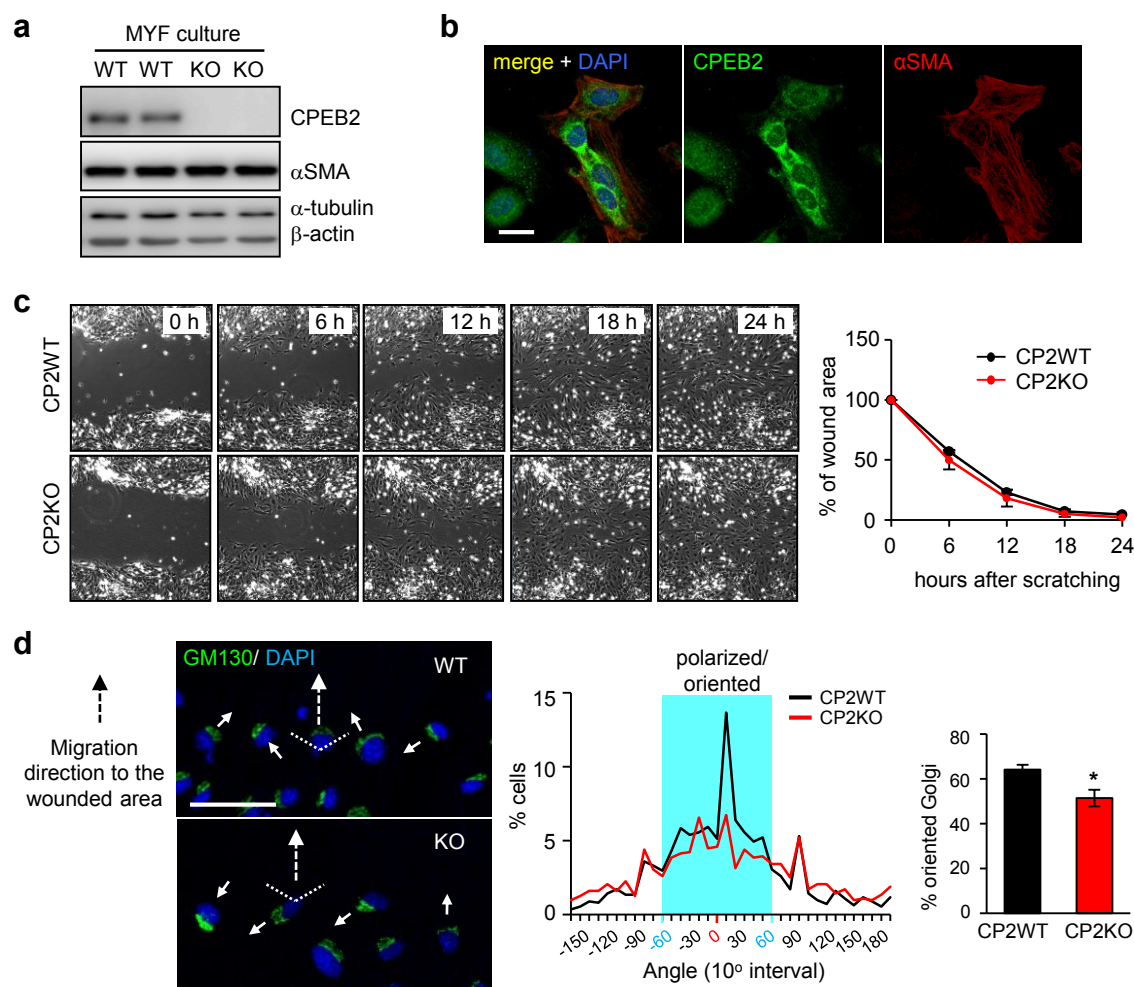

**Figure S5.** CPEB2 deficiency impairs polarity of MYFs during migration. **a** Primary pulmonary MYF cultures were harvested for immunoblotting of CPEB2, αSMA, α-tubulin and β-actin. **b** Cultured pulmonary MYFs were fixed for immunostaining of CPEB2 and αSMA and DAPI-labeling. Scale, 20 μm. **c** Time-lapse images and quantification of WT and CPEB2-KO MYF repopulation in wound-healing assay. The wounded areas at the denoted time after scratching were measured, with the area at 0 h set to 100%. Data are mean ± s.e.m from 4 independent experiments. **d** Cell/Golgi polarity assay. CPEB2-WT and -KO MYF cultures at 6 h after scratching were fixed for DAPI-labeling and immunostaining of the Golgi marker GM130. Polarized (or oriented) MYFs were defined when the GM130-stained Golgi was oriented within a 60° angle perpendicular to the migration direction toward the wound. Data are mean ± s.e.m. from 3 independent experiments, \* $P < 0.05$ , by two-tailed Student's  $t$  test. Scale, 100 μm.

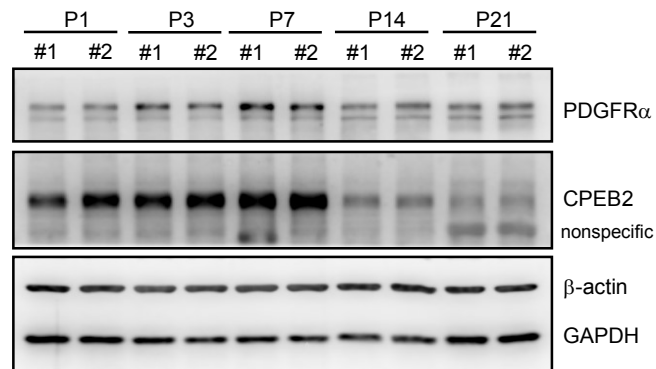

**Figure S6.** The expression of CPEB2 and PDGFR $\alpha$  in MYFs isolated from different postnatal ages. Primary MYFs were cultured from P1, P3, P7, P14 and P21 lung tissues (2 independent cultures from 2 mice per postnatal day) and then harvested at DIV1 for immunoblotting of PDGFR $\alpha$ , CPEB2,  $\beta$ -actin and GAPDH.



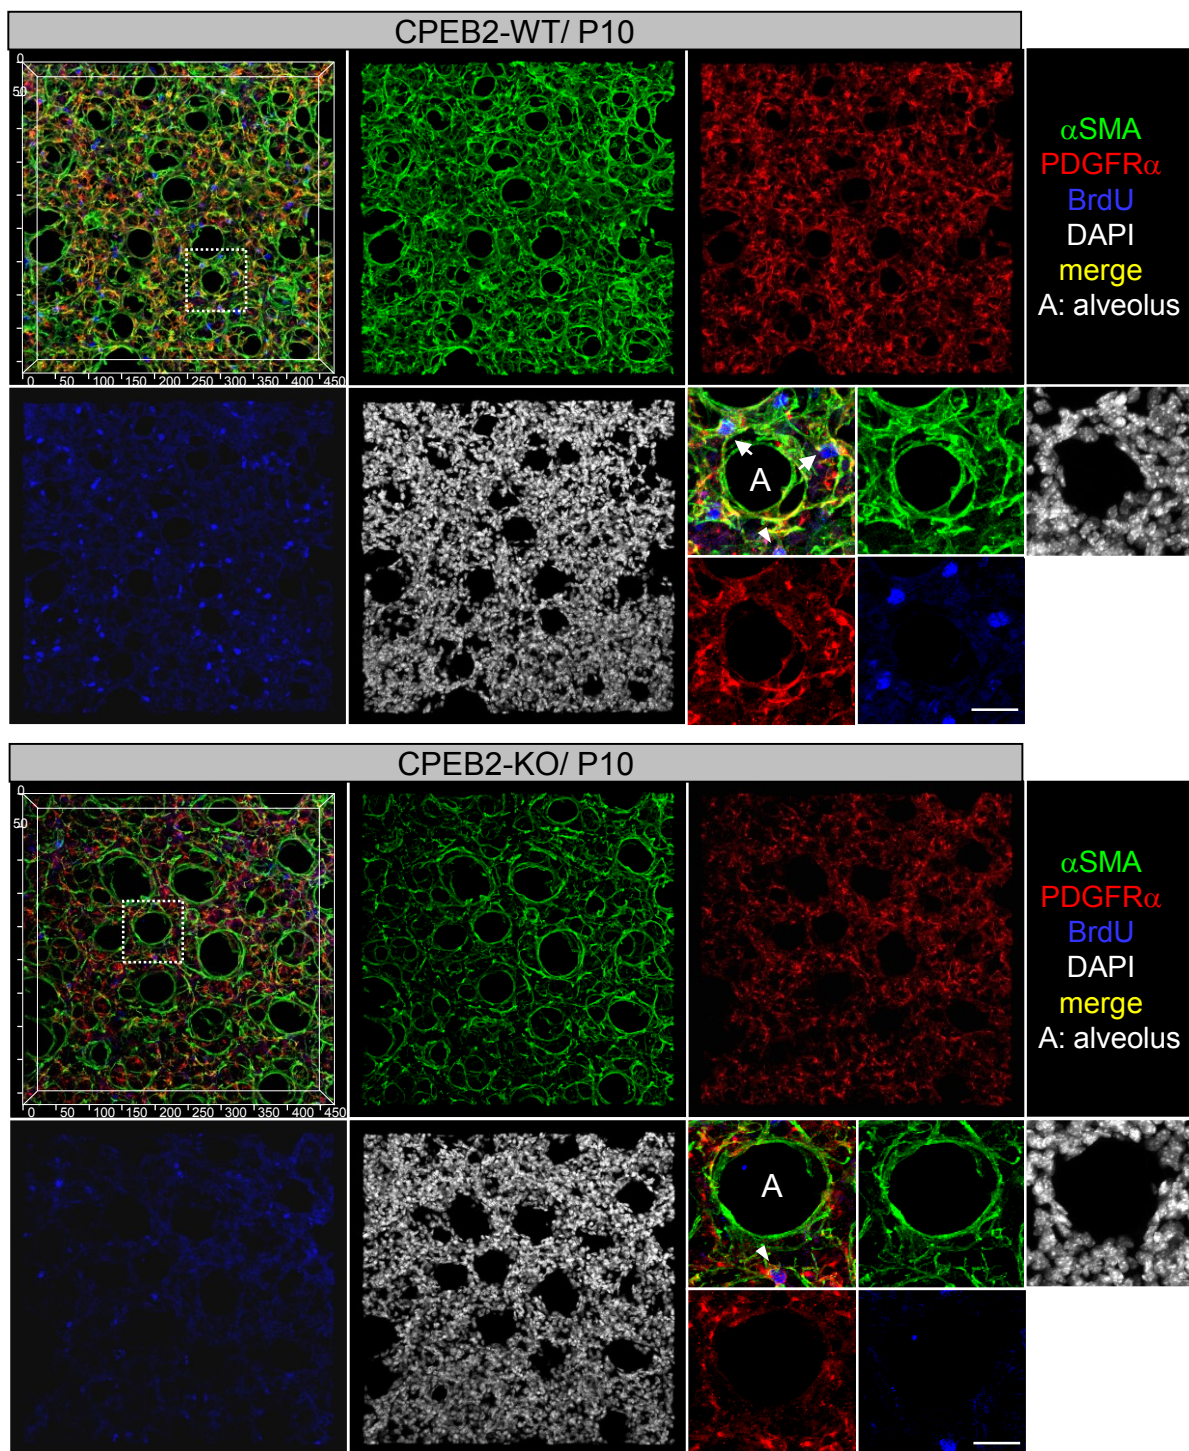

**Figure S7.** Reduced proliferating MYF precursors in CPEB2-KO lung. 3D rendering images of P10 WT and KO lungs immunostained with BrdU, PDGFR $\alpha$  and  $\alpha$ SMA. Arrowheads and arrows in magnified images of selected alveoli denote BrdU<sup>+</sup>PDGFR $\alpha$ <sup>+</sup> and BrdU<sup>+</sup>PDGFR $\alpha$ <sup>+</sup> $\alpha$ SMA<sup>+</sup> cells, respectively. Scales, 50  $\mu$ m.



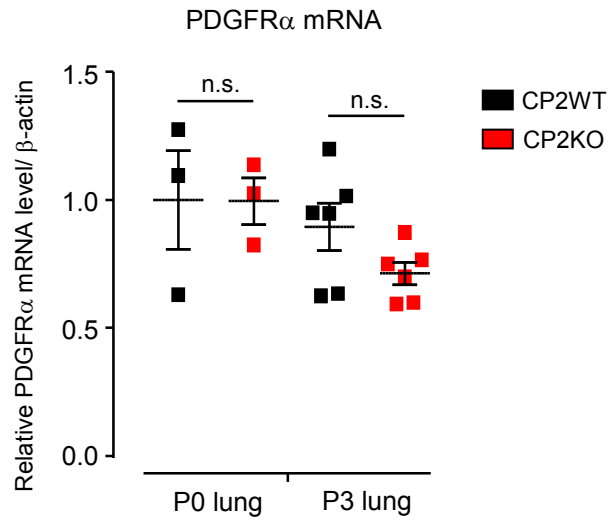

**Figure S8.** Unaltered PDGFR $\alpha$  mRNA level in CPEB2-KO lung. P0 and P3 CP2WT and CP2KO lungs were harvested for RT-qPCR of PDGFR $\alpha$  mRNA level relative to  $\beta$ -actin. Data are mean  $\pm$  s.e.m. from 3 mice per genotype at P0 and 6 mice per genotype at P3.

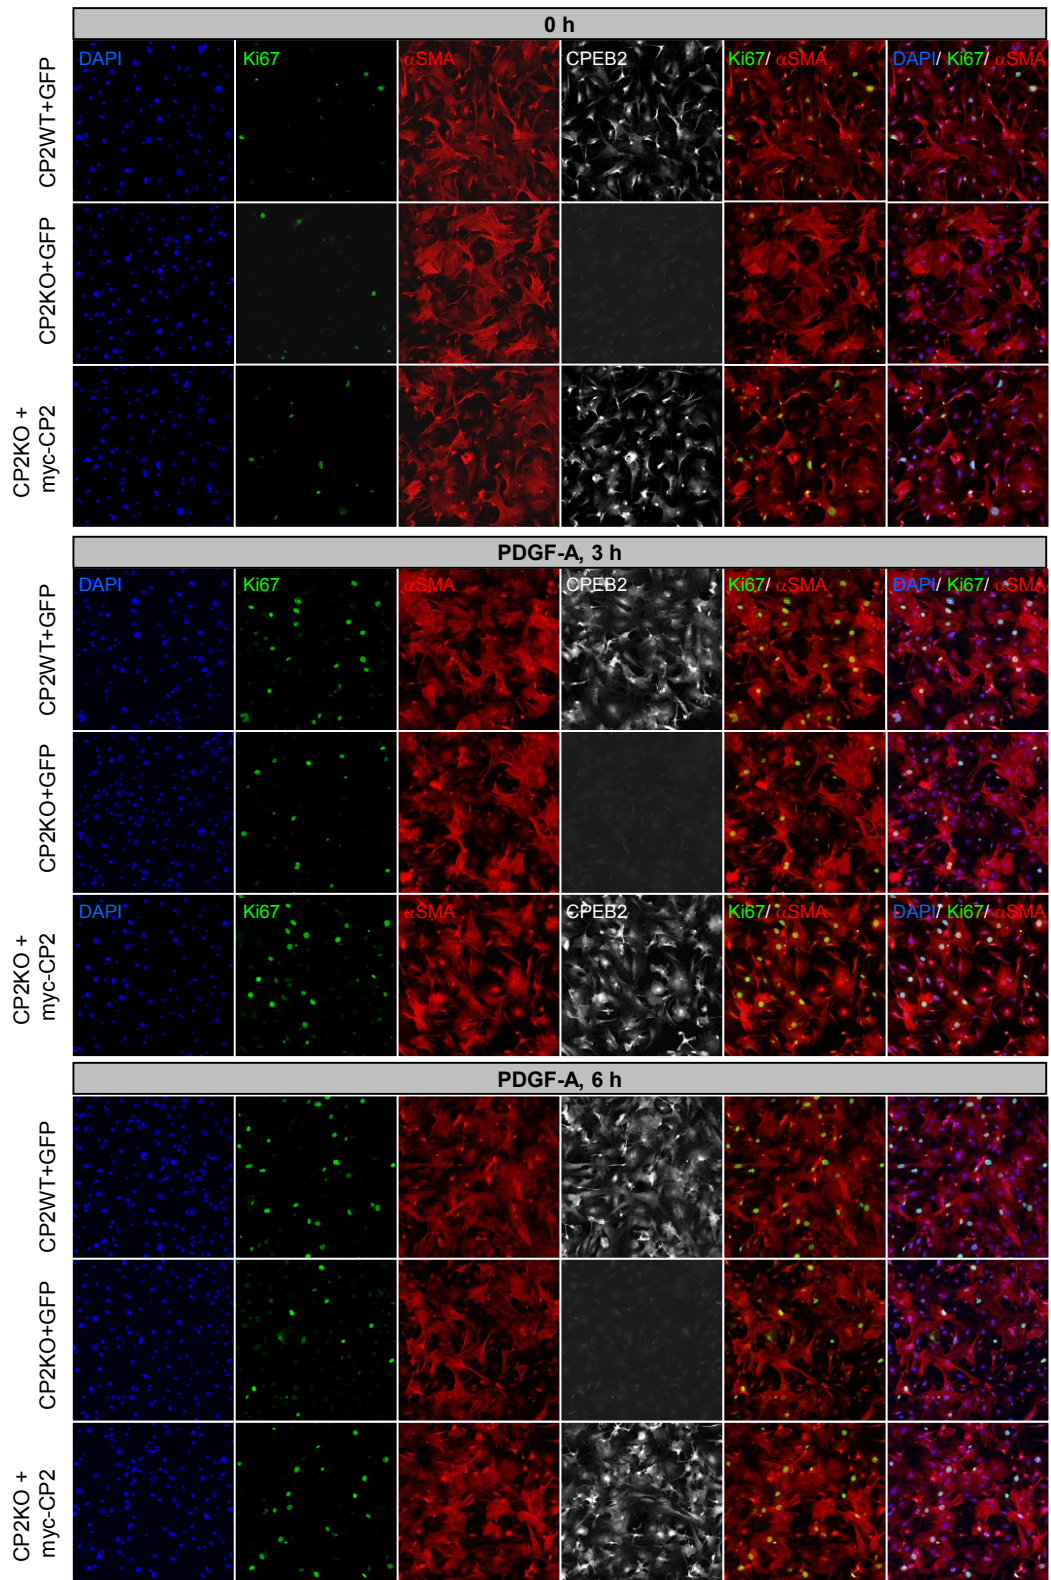

**Figure S9.** Impaired PDGF-A-induced Ki67 expression in CPEB2-KO MYF culture. CPEB2-WT and CPEB2-KO MYFs infected with lentiviruses expressing GFP or myc-CPEB2 were treated with PDGF-A for the indicated time, followed by labeling of DAPI, CPEB2, Ki67 and  $\alpha$ SMA. Representative images of each time point are shown. Because of low GFP level, its auto-fluorescence did not interfere with Ki-67-immunostained signal.
